# Supplementary material
Source: publisher figshare collection journal article supplement (https://geolsoc.figshare.com/articles/dataset/_/3454121)
Supplement: Supplementary file 1 [file 1]

## Appendix 2

### Concordia diagrams

Figure A1 shows Tera-Wasserburg concordia diagrams for detrital zircon in the young sediments, data from Appendix 1 in supplementary material.

- (a) Zircons from sediments of the Maputaland Group.
- (b) Zircons from Recent stream sediments on Karoo dolerite, Mesoproterozoic granite and gneiss and beach sand.
- (c) Zircons from Recent sediments deposited on Archaean basement rocks. Note that Archaean zircons in sample SA12/32 are shown in an inset at higher  $^{207}\text{Pb}/^{206}\text{Pb}$  ratio than the main part of the diagram.

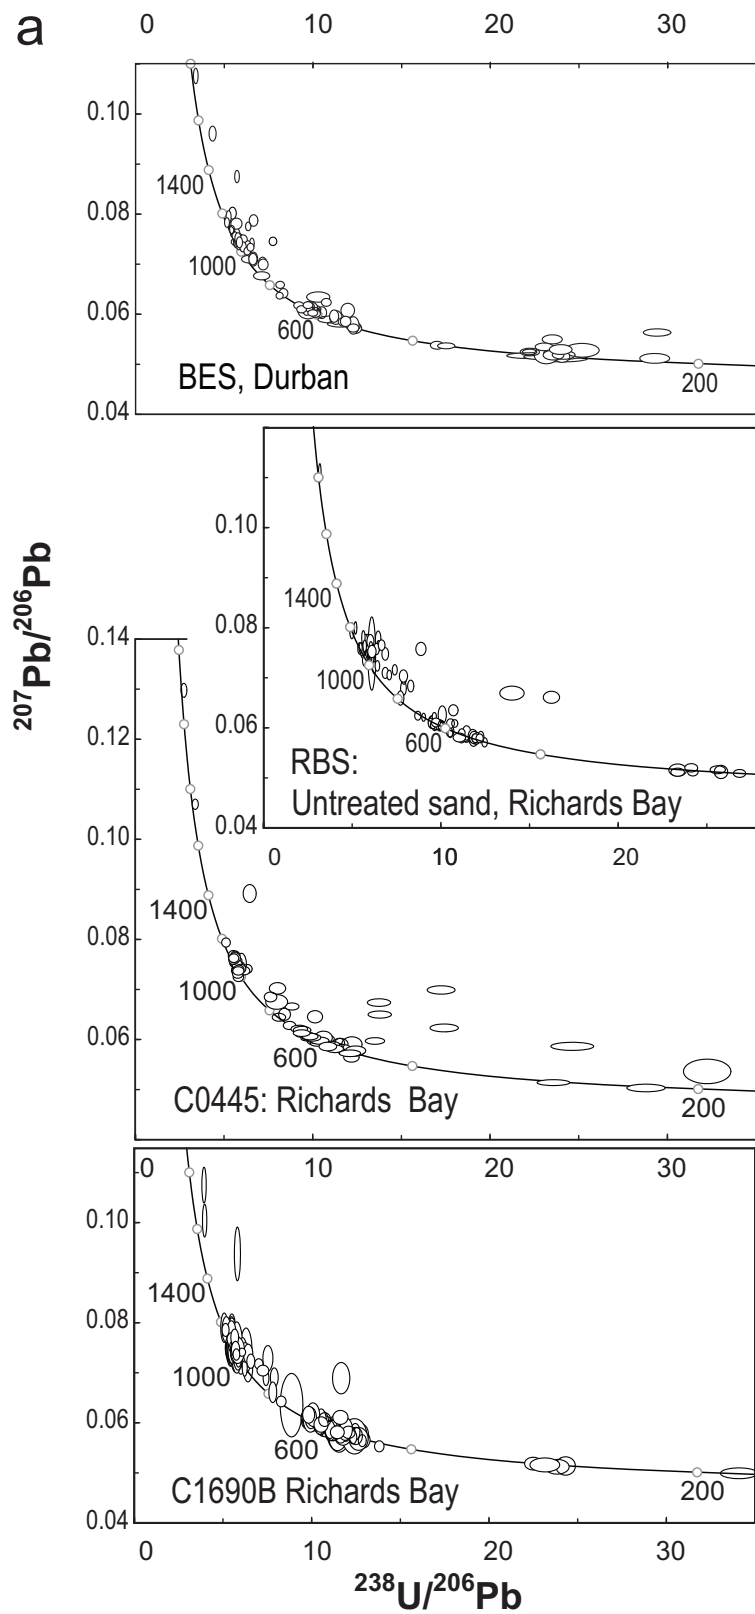

Figure A1a

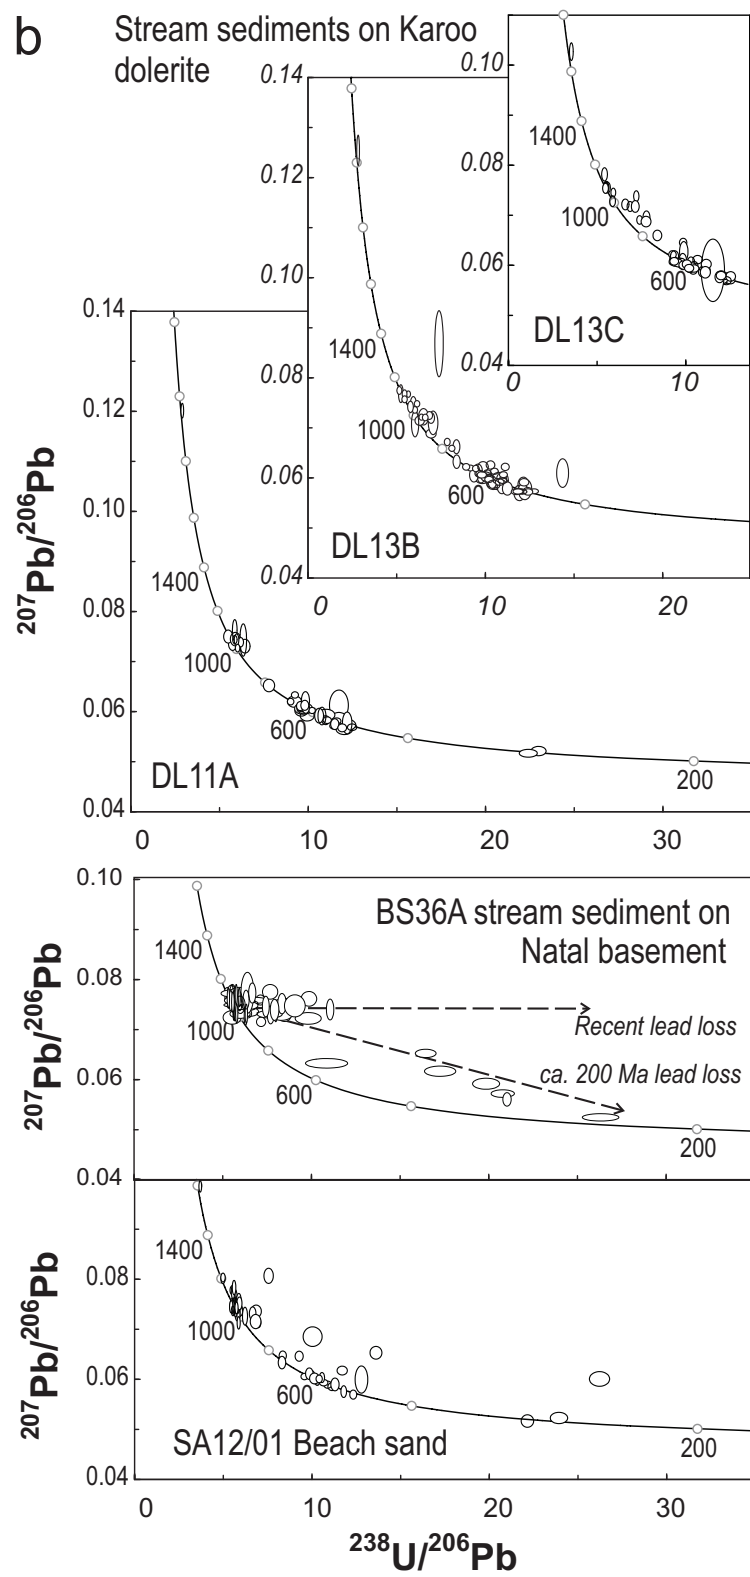

Figure A1b

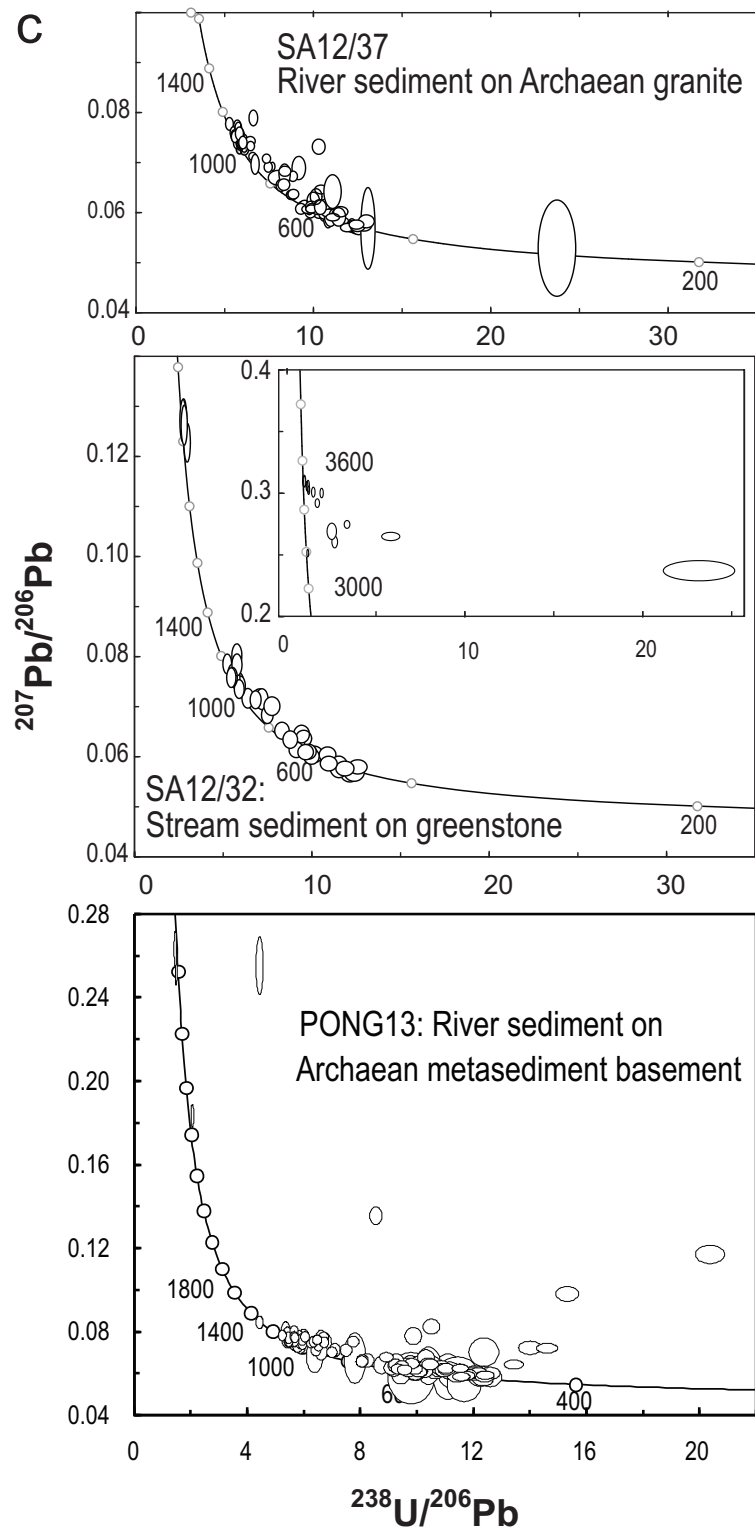

Figure A1c

## Effects of discordance

Zircons may be discordant because of loss of radiogenic lead after crystallization or because of the presence of uncorrected common lead (Andersen 2002, Gehrels 2012). In the present case, common lead has, as far as possible, been removed by a conventional common lead correction based on the observed  $^{204}\text{Pb}/^{206}\text{Pb}$  ratio, so the residual discordance in grains reported in Appendix 1 is due to lead loss. Lead-loss discordance causes observed  $^{206}\text{Pb}/^{238}\text{U}$  and  $^{207}\text{Pb}/^{235}\text{U}$  ratios (and hence the corresponding ages) to be lower than the undisturbed values. If lead loss has taken place in the geological past (ancient lead loss), the  $^{207}\text{Pb}/^{206}\text{Pb}$  ratio (and age) is also affected. In eastern South Africa, a significant thermal event at ca. 180 Ma related to Karoo magmatism and breakup of Gondwana may have caused lead loss effects also for the  $^{207}\text{Pb}/^{206}\text{Pb}$  age.

Two of our samples which have yielded a significant fraction of zircon showing lead-loss effects will be used as examples here: *SA12/32* and *BS36A*.

For the Archaean age fraction in *SA12/32*, ancient lead-loss, probably of Mesozoic age caused in part severe discordance. Projecting these grains back to the concordia from the origin (i.e. calculating the  $^{207}\text{Pb}/^{206}\text{Pb}$  age) results in ages in the range 3000-3200 Ma (Fig. A2a), suggesting the existence of a late Palaeoarchaeon to early Mesoarchaeon age fraction in this sample. The concordant (i.e. less than 10 % normally discordant) grains do not show indications of such a fraction. This apparent age fraction is a result of significant loss of radiogenic lead in an event that is sufficiently old to affect the  $^{207}\text{Pb}/^{206}\text{Pb}$  age. Effects of this lead loss event is seen also in ca. 3.55 Ga basement rocks from the same area (Jele, 2014), and in many rocks from other parts of the Kaapvaal Craton (e.g. Zeh et al., 2010, 2011, 2013)

In contrast, *BS36A* has a single Mesoproterozoic age fraction (1000-1150 Ma), overprinted by both Mesozoic and Recent lead loss (Fig. A2b). The origin of zircon in this sample may be from ca. 1.15 -1.20 Ga gneisses and granitic intrusions of the Mzumbe terrane of the Natal sector (McCourt *et al.* 2006; Spencer *et al.* 2015). Lead-loss has spread the affected zircons out in a field limited by lead-loss lines to lower intercepts at 0 and ca. 200 Ma. The effect is most severe in the  $^{206}\text{Pb}/^{238}\text{U}$  age (Fig.

A2b) – if discordant zircons are included, spurious Neoproterozoic and Phanerozoic age fractions would be suggested. Even when using the  $^{207}\text{Pb}/^{206}\text{Pb}$  on less than 10% discordant zircon, a spread of ages towards 1000 Ma is indicated, which is not supported by Hf isotope data which suggest that the zircon population in this sample is monogenetic, except for rare, Palaeoproterozoic inheritance.

Table A2 shows pairwise comparisons of the samples in the present study using the likeness and overlap parameters described in the main text applied to the whole data set, including discordant grains. These tables should be compared to Tables 2 and 3 in the main text. There are minor changes in  $L_1$ ,  $L_2$  and  $O$  values which are most noticeable for pairs including SA12/32 and BS36A, which have the largest fractions of discordant grains, but the overall pattern of overlap and likeness among the samples remains unchanged.

#### *References for Appendix 2*

- JELE, N.L. 2014. *The genesis of the quartz-sericite schists of the Toggekry formation, Nondweni greenstone belt, South Africa*. MSc thesis, University of KwaZulu-Natal, 159 pp.
- MCCOURT, S., ARMSTRONG, R.A., GRANTHAM, G.H. & THOMAS, R.J. 2006. Geology and evolution of the Natal belt, South Africa. *Journal of African Earth Sciences*, **46**, 71–92.
- SPENCER, C.J., THOMAS, R.J., ROBERTS, N-M.W., CAWOOD, P.A., MILLAR, I. & TAPSTER, S., 2015. Crustal growth during island arc accretion and transcurrent deformation, Natal Metamorphic Province, South Africa: New isotopic constraints. *Precambrian Research*, **265**, 203-217.
- ZEH, A. & GERDES, A.H., C. 2013. U–Pb and Hf isotope data of detrital zircons from the Barberton Greenstone Belt: constraints on provenance and Archaean crustal evolution. *Journal of the Geological Society*, **170**, 215-223.
- ZEH, A., GERDES, A. & MILLONIG, L. 2013. Hafnium isotopic record of the Ancient Gneiss Complex, Swaziland, southern Africa: evidence for Archaean crust-mantle formation and crust reworking between 3.66 and 2.73 Ga. *Journal of the Geological Society*, London, **168**, 953-963.

ZEH, A., GERDES, A., BARTON, J. & KLEMD, R. 2010. U-Th-Pb and Lu-Hf systematics of zircon from TTG's, leucosomes, meta-anorthosites and quartzites of the Limpopo Belt (South Africa): Constraints for the formation, recycling and metamorphism of Palaeoarchaeon crust. *Precambrian Research*, **179**, 50-68.

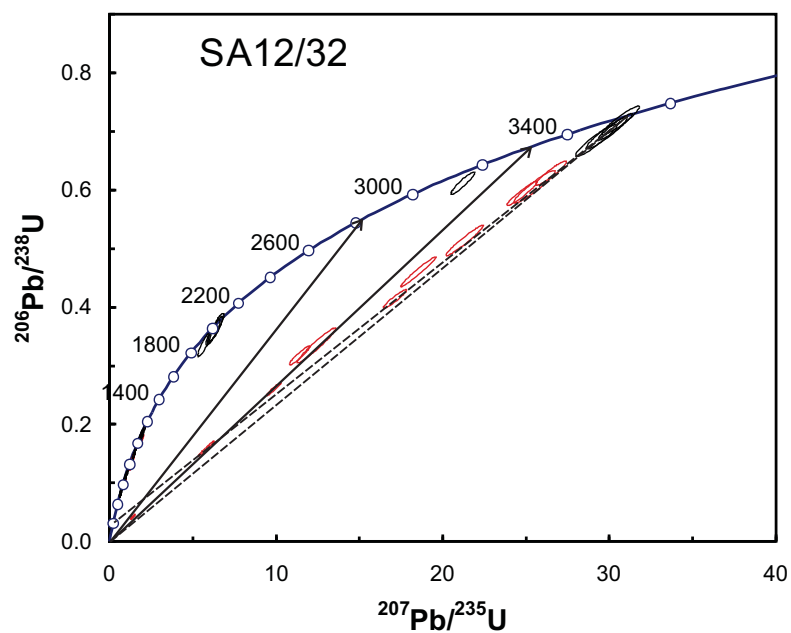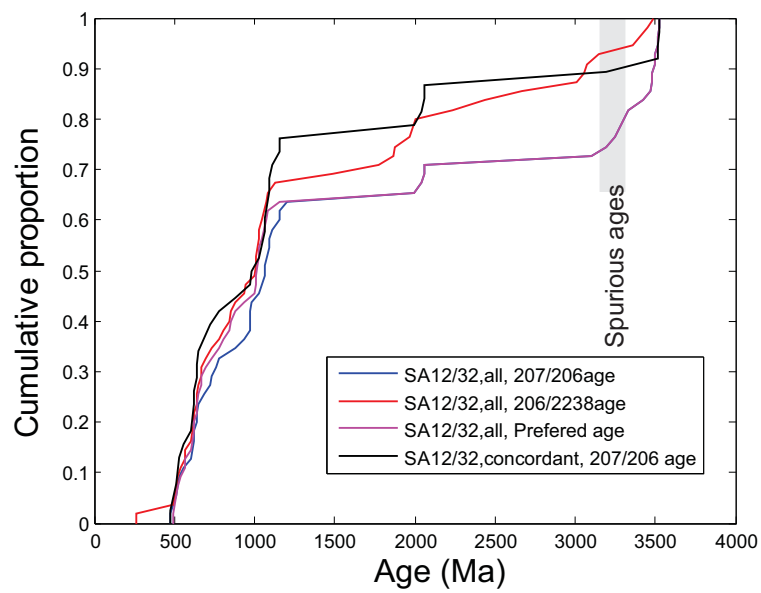

Fig A2a

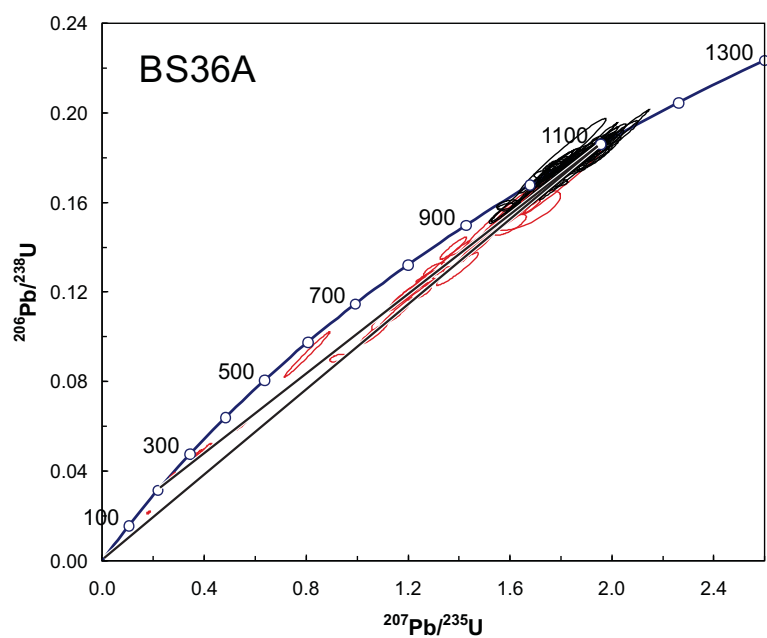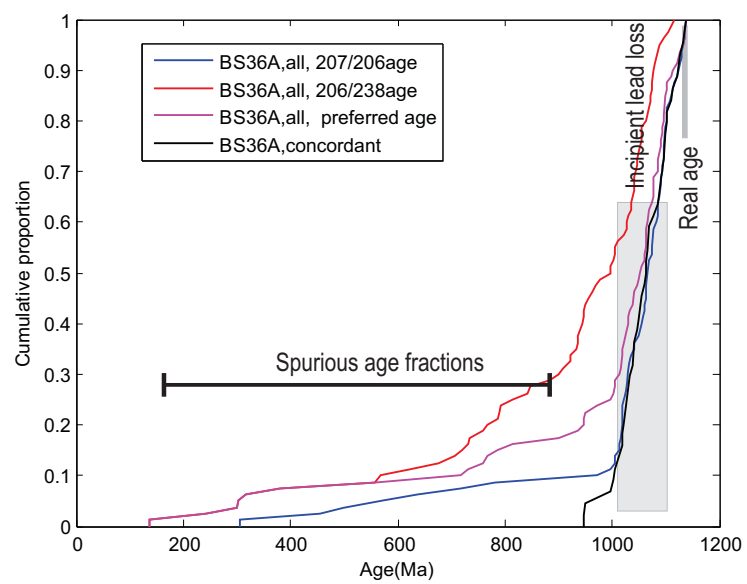

Fig A2b
